# Supplementary material for: Cancer Stem Cell Marker Endoglin (CD105) Induces Epithelial Mesenchymal Transition (EMT) but Not Metastasis in Clear Cell Renal Cell Carcinoma
Source: Hindawi journal article supplement (doi:10.1155/2019/9060152), 2019-03-19
Supplement: f1 [file 9060152.f1.pdf]

## Supplementary Figure S1

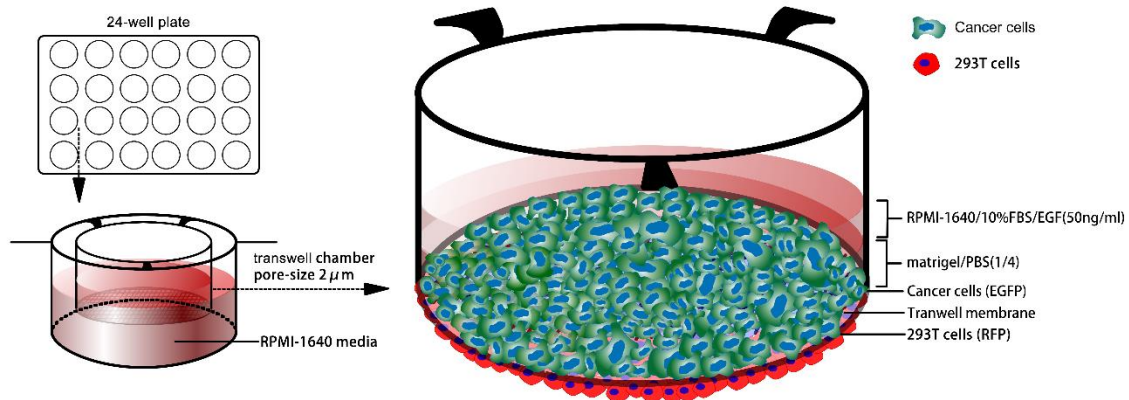

### Figure Legend

**Supplementary Figure S1. Schematic organization of cells and transwell inserts in the modified 3D transwell assay.**

## Supplementary table S1. Primer sequences

**Table 1: Primer sequences**

| Primer Name | strand  | sequence(5'-3')         |
|-------------|---------|-------------------------|
| TWIST-1     | forward | GTCCGCAGTCTTACGAGGAG    |
|             | reverse | GCTTGAGGGTCTGAATCTTGCT  |
| ZEB-1       | forward | TTACACCTTTGCATACAGAACCC |
|             | reverse | TTTACGATTACACCCAGACTGC  |
| SNAI-1      | forward | ACTGCAACAAGGAATACCTCAG  |
|             | reverse | GCACTGGTACTTCTTGACATCTG |
| VIM         | forward | TGCCGTTGAAGCTGCTAACTA   |
|             | reverse | CCAGAGGGAGTGAATCCAGATTA |
| GAPDH       | forward | CTGGGCTACACTGAGCACC     |
|             | reverse | AAGTGGTCGTTGAGGGCAATG   |
